# Supplementary material for: LIFR inhibition enhances the therapeutic efficacy of HDAC inhibitors in triple negative breast cancer
Source: PubMed Central journal article supplement (PMC8556368; doi:10.1038/s42003-021-02741-7), 2021-10-29
Supplement: 42003_2021_2741_MOESM3_ESM.pdf [file 42003_2021_2741_MOESM3_ESM.pdf]

## Description of Additional Supplementary Files

**File name:** Supplementary Data 1.

**Description:** Source data for the graphs and charts.
